# Supplementary material for: Solution-Processed Bilayered ZnO Electron Transport Layer for Efficient Inverted Non-Fullerene Organic Solar Cells
Source: MDPI journal article supplement (doi:10.3390/nanomanufacturing4020006), 2024-04-01
Supplement: s1 [file s1]

## Supporting information

### Solution-Processed Bilayered ZnO Electron Transport Layer for Efficient Inverted Non-Fullerene Organic Solar Cells

Walia Binte Tarique<sup>a\*</sup>, Md Habibur Rahaman<sup>b</sup>, Shahriyar Safat Dipta<sup>a</sup>, Ashraful Hossain Howlader<sup>a</sup>, and Ashraf Uddin<sup>a\*</sup>

<sup>a</sup> School of Photovoltaic and Renewable Energy Engineering, University of New South Wales, Sydney, NSW 2052, Australia

<sup>b</sup> School of Chemistry, University of New South Wales, Sydney, NSW 2052, Australia

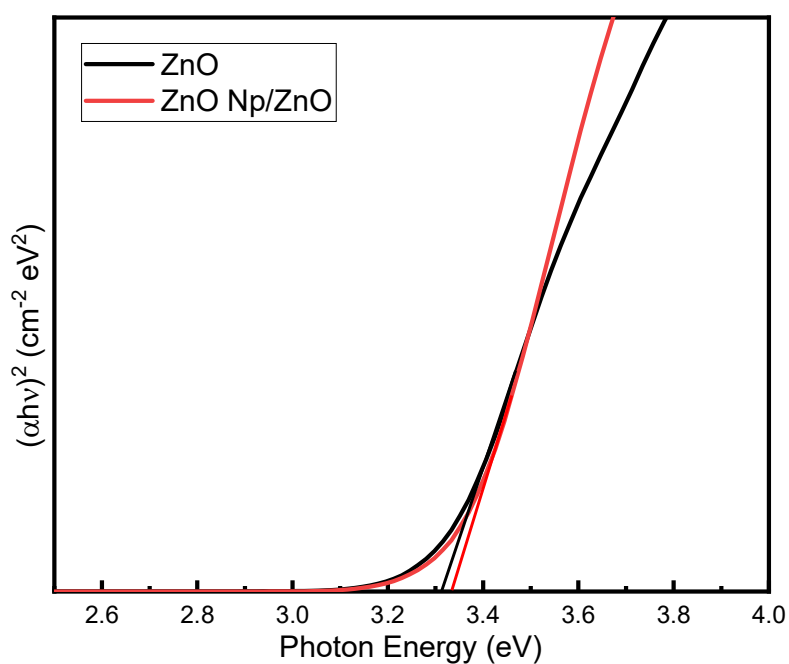

**Figure S1.** Bandgap of ZnO ETL and ZnO NP/ZnO ETL determined from the Tauc plot.

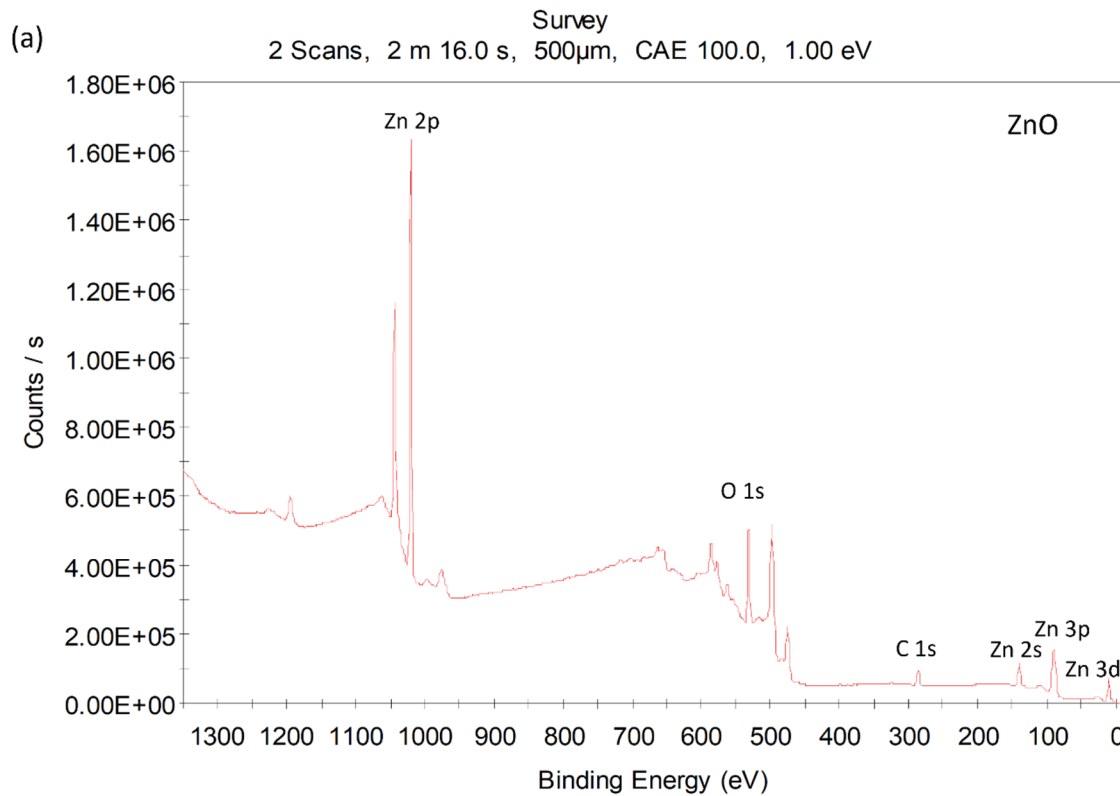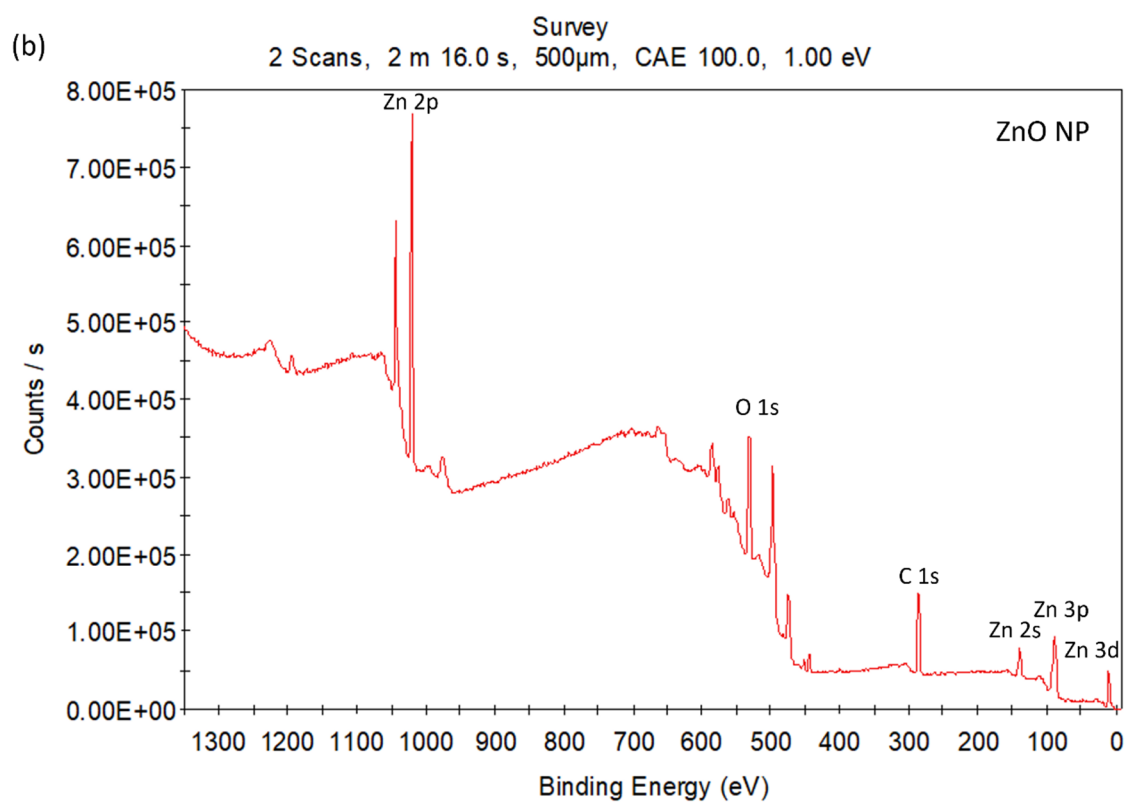

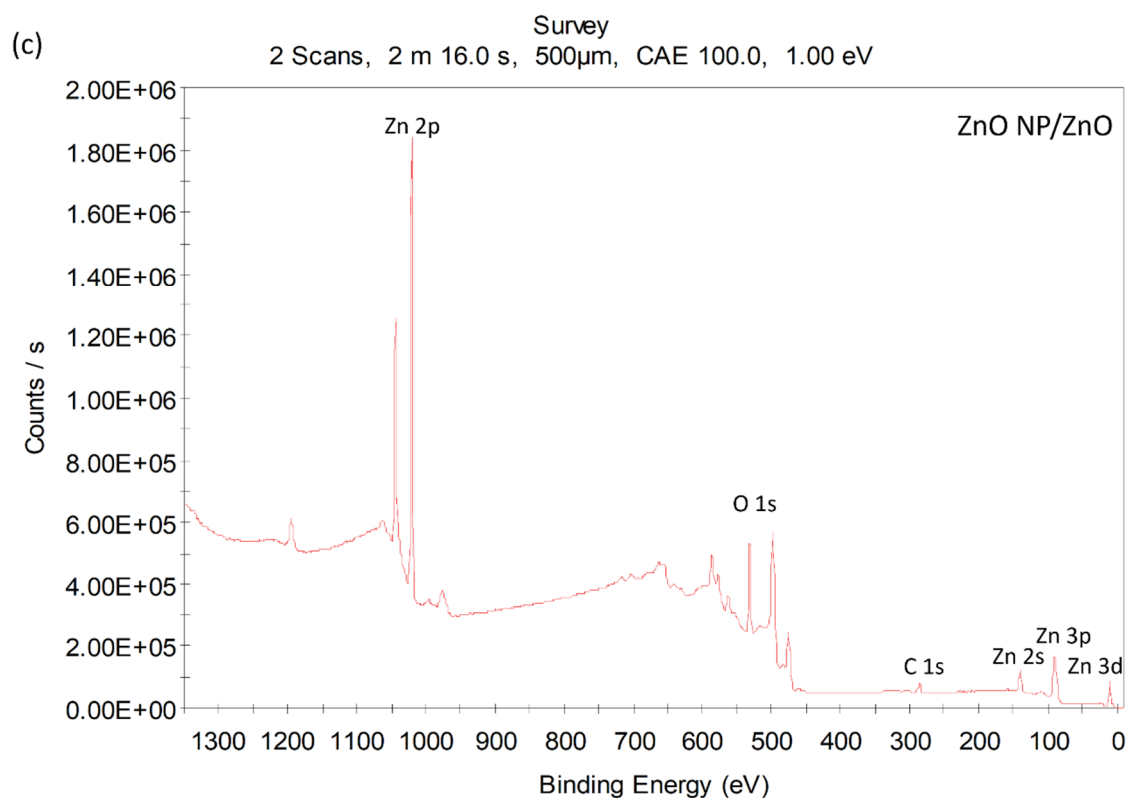

**Figure S2.** X-Ray photoelectron spectroscopy (XPS) survey spectra of (a) ZnO, (b) ZnO-NP and (c) bilayer ETLs, on ITO/glass substrate, demonstrating the elemental peaks.

**Table S1:** Photovoltaic parameters of organic solar cells with ZnO-based electron transport layer (ETL)

| ELT                      | Donors         | Acceptors | $V_{oc}$<br>[V] | $J_{sc}$<br>[mA cm <sup>-2</sup> ] | $FF$<br>[%] | PCE<br>[%] | [Ref] |
|--------------------------|----------------|-----------|-----------------|------------------------------------|-------------|------------|-------|
| Li-doped ZnO             | PTB7-Th        | IT-4F     | 0.83            | 16.20                              | 67          | 8.96       | [1]   |
| KOH-ZnO                  | PBDB-T-<br>2CL | Y1-4F     | 0.84            | 23.0                               | 78.3        | 63         | [2]   |
| ZnO/C <sub>60</sub> -SAM | PTB7-Th        | IEICO-4F  | 0.71            | 22.70                              | 60          | 7.40       | [3]   |
| ZnO:PFN-Br               | PBDB-T         | IT-4F     | 0.87            | 20.02                              | 79          | 13.82      | [4]   |
| ZnO/TiO <sub>2</sub>     | PTB7-Th        | IEICO-4F  | 0.7             | 24.2                               | 61.1        | 10.3       | [5]   |
| ZnO/ASP-SWNT             | PM6            | Y6        | 0.87            | 24.90                              | 66          | 14.37      | [6]   |

|                                             |         |                     |      |       |       |       |      |
|---------------------------------------------|---------|---------------------|------|-------|-------|-------|------|
| CsI/ZnO                                     | PTB7    | PC <sub>71</sub> BM | 0.73 | 17.6  | 56.6  | 7.3   | [7]  |
| MgO/ZnO                                     | PTB7-Th | PC <sub>71</sub> BM | 0.80 | 19.28 | 71.51 | 11.01 | [8]  |
| In <sub>2</sub> O <sub>3</sub> /ZnO<br>(NP) | PTB7-Th | PC <sub>71</sub> BM | 0.81 | 18.3  | 66    | 9.8   | [9]  |
| ZnO/glycine                                 | PM6     | IT-4F               | 0.85 | 22.01 | 75    | 14    | [10] |

**Table S2:** XRD parameters for ZnO, ZnO NP, and ZnO NP/ZnO ELTs.

| Sample     | Peak position [2 $\theta$ ] | d-spacing [Å] | FWHM [°2 $\theta$ ] | Crystallite Size only [nm] |
|------------|-----------------------------|---------------|---------------------|----------------------------|
| ZnO        | 31.7409                     | 2.81683       | 0.614               | 13.45                      |
|            | 34.1538                     | 2.62314       | 1.4327              | 5.80                       |
|            | 36.1542                     | 2.48246       | 0.614               | 13.61                      |
| ZnO NP     | 31.6569                     | 2.82411       | 0.4093              | 20.17                      |
|            | 34.262                      | 2.61511       | 0.7164              | 11.60                      |
|            | 36.0083                     | 2.49218       | 0.3582              | 23.32                      |
| ZnO NP/ZnO | 31.8081                     | 2.81103       | 0.4093              | 20.18                      |
|            | 34.3373                     | 2.60954       | 0.614               | 13.54                      |
|            | 36.0687                     | 2.48815       | 0.307               | 27.21                      |

**Table S3:** Peak binding energy, peak full width at half maximum, and atomic percentage of ETL films (ZnO, ZnO-NP and bilayer) from X-Ray photoelectron spectroscopy (XPS) data.

| ETL | Peak | Start Binding | Peak Binding | End Binding | Full Width at Half | Atomic Percentage |
|-----|------|---------------|--------------|-------------|--------------------|-------------------|
|-----|------|---------------|--------------|-------------|--------------------|-------------------|

|                    |                   | Energy<br>(eV) | Energy<br>(eV) | Energy<br>(eV) | Maximum<br>(FWHM)<br>(eV) | (%)   |
|--------------------|-------------------|----------------|----------------|----------------|---------------------------|-------|
| <b>ZnO</b>         | O <sub>1s</sub> A | 539.1          | 529.87         | 523.1          | 1.08                      | 14.45 |
|                    | O <sub>1s</sub> B | 539.1          | 531.32         | 523.1          | 2.22                      | 29.66 |
| <b>ZnO-<br/>NP</b> | O <sub>1s</sub> A | 539.1          | 529.51         | 523.1          | 1.31                      | 13.93 |
|                    | O <sub>1s</sub> B | 539.1          | 532.35         | 523.1          | 1.78                      | 18.11 |
|                    | O <sub>1s</sub> C | 539.1          | 530.6          | 523.1          | 1.31                      | 8.02  |
| <b>Bilayer</b>     | O <sub>1s</sub> A | 539.3          | 530.11         | 523.3          | 1.13                      | 22.01 |
|                    | O <sub>1s</sub> B | 539.3          | 531.68         | 523.3          | 1.76                      | 23.86 |

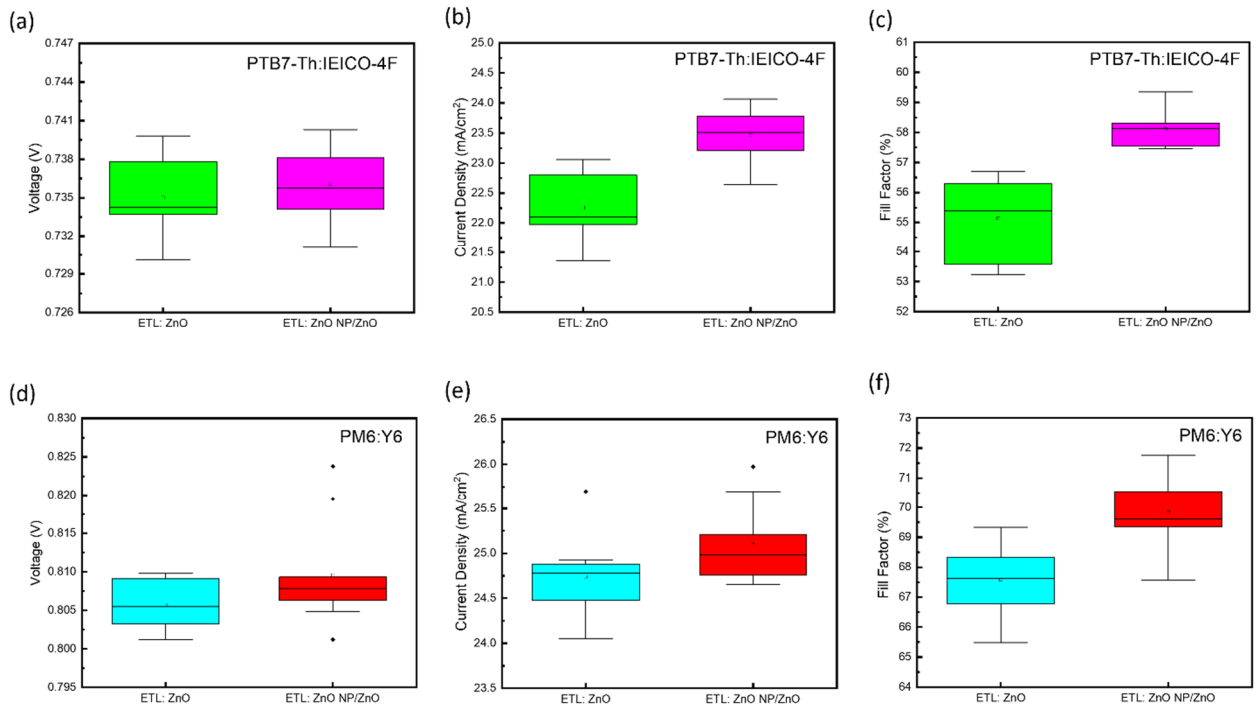

**Figure S3.** Statistical distribution of the device parameters (devices with ZnO and bilayer ZnO NP/ZnO) displayed (a,d)  $V_{oc}$  (V), (b,e)  $J_{sc}$  (mA/cm<sup>2</sup>), and (c,f) FF (%). 10 cells have been tested for each case. A bilayer device exhibits a simultaneous improvement in all photovoltaic parameters compared to the ZnO control device.

**Table S4:** Electrical parameters extracted from Nyquist plot for ZnO only and ZnO NP/ZnO devices

| Device           | Parameters                          | ZnO<br>ETL | ZnO NP/ZnO<br>ETL | Unit      |
|------------------|-------------------------------------|------------|-------------------|-----------|
| PTB7-Th:IEICO-4F | Series resistance, $R_s$            | 152        | 143               | $\Omega$  |
|                  | Transport resistance, $R_t$         | 545        | 618               | $\Omega$  |
|                  | Recombination resistance, $R_{rec}$ | 7.47       | 10.9              | $K\Omega$ |
|                  | Bulk capacitance, $C_g$             | 10.9       | 9.68              | nF        |
|                  | Chemical capacitance, $C_\mu$       | 5.89       | 4.47              | nF        |
| PM6:Y6           | Series resistance, $R_s$            | 82.8       | 74.5              | $\Omega$  |
|                  | Transport resistance, $R_t$         | 848.2      | 953               | $\Omega$  |
|                  | Recombination resistance, $R_{rec}$ | 2.46       | 6.35              | $K\Omega$ |
|                  | Bulk capacitance, $C_g$             | 4.35       | 6.31              | nF        |
|                  | Chemical capacitance, $C_\mu$       | 11.2       | 3.23              | nF        |

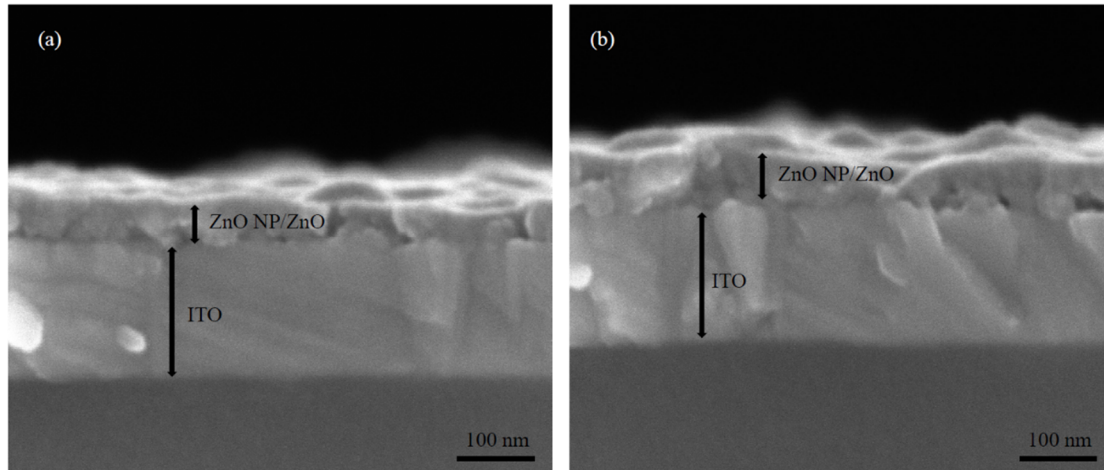

**Figure S4.** (a,b) Cross-section SEM images of fresh and aged bilayer ZnO NP/ZnO ETL.

## References

1. Soultati, A.; Fakharuddin, A.; Polydorou, E.; Drivas, C.; Kaltzoglou, A.; Haider, M.I.; Kournoutas, F.; Fakis, M.; Palilis, L.C.; Kennou, S.; et al. Lithium Doping of ZnO for High Efficiency and Stability Fullerene and Non-Fullerene Organic Solar Cells. *ACS Appl. Energy Mater.* **2019**, *2*, 1663–1675, <https://doi:10.1021/acsaem.8b01658>.
2. Cheng, H.-W.; Raghunath, P.; Wang, K.; Cheng, P.; Haung, T.; Wu, Q.; Yuan, J.; Lin, Y.-C.; Wang, H.-C.; Zou, Y.; et al. Potassium-Presenting Zinc Oxide Surfaces Induce Vertical Phase Separation in Fullerene-Free Organic Photovoltaics. *Nano Lett.* **2020**, *20*, 715–721, <https://doi:10.1021/acs.nanolett.9b04586>.
3. Xu, X.; Xiao, J.; Zhang, G.; Wei, L.; Jiao, X.; Yip, H.-L.; Cao, Y. Interface-Enhanced Organic Solar Cells with Extrapolated T80 Lifetimes of over 20 years. *Science Bulletin* **2020**, *65*, 208–216, <https://doi:10.1016/j.scib.2019.10.019>.
4. Zheng, Z.; Zhang, S.; Wang, J.; Zhang, J.; Zhang, D.; Zhang, Y.; Wei, Z.; Tang, Z.; Hou, J.; Zhou, H. Exquisite Modulation of ZnO Nanoparticle Electron Transporting Layer for High-Performance Fullerene-Free Organic Solar Cell with Inverted Structure. *J. Mater. Chem. A* **2019**, *7*, 3570–3576, <https://doi:10.1039/C8TA11624E>.
5. Habibur Rahaman, M.; Sang, B.; Anower Hossain, Md.; Hoex, B.; Mota-Santiago, P.; Mitchell, V.D.; Uddin, A.; Stride, J.A. Impact of the Bilayer Electron Transport Layer in the Donor Acceptor Bulk Heterojunctions for Improved Inverted Organic Photovoltaic Performance. *Applied Surface Science* **2023**, *612*, 155669, <https://doi:10.1016/j.apsusc.2022.155669>.
6. Lee, S.-H.; Ko, S.-J.; Eom, S.H.; Kim, H.; Kim, D.W.; Lee, C.; Yoon, S.C. Composite Interlayer Consisting of Alcohol-Soluble Polyfluorene and Carbon Nanotubes for Efficient Polymer Solar Cells. *ACS Applied Materials & Interfaces* **2020**, <https://doi:10.1021/acsami.9b22933>.
7. Upama, M.B.; Elumalai, N.K.; Mahmud, M.A.; Wright, M.; Wang, D.; Xu, C.; Haque, F.; Chan, K.H.; Uddin, A. Interfacial Engineering of Electron Transport Layer Using Caesium Iodide for Efficient and Stable Organic Solar Cells. *Applied Surface Science* **2017**, *416*, 834–844, <https://doi:10.1016/j.apsusc.2017.04.164>.
8. Huang, S.; Kang, B.; Duan, L.; Zhang, D. Highly Efficient Inverted Polymer Solar Cells by Using Solution Processed MgO/ZnO Composite Interfacial Layers. *Journal of Colloid and Interface Science* **2021**, *583*, 178–187, <https://doi:10.1016/j.jcis.2020.09.047>.
9. Eisner, F.; Seitzkhan, A.; Han, Y.; Khim, D.; Yengel, E.; Kirmani, A.R.; Xu, J.; García de

- Arquer, F.P.; Sargent, E.H.; Amassian, A.; et al. Solution-Processed In<sub>2</sub>O<sub>3</sub>/ZnO Heterojunction Electron Transport Layers for Efficient Organic Bulk Heterojunction and Inorganic Colloidal Quantum-Dot Solar Cells. *Solar RRL* **2018**, *2*, 1800076, <https://doi:10.1002/solr.201800076>.
10. Zhu, X.; Guo, B.; Fang, J.; Zhai, T.; Wang, Y.; Li, G.; Zhang, J.; Wei, Z.; Duhm, S.; Guo, X.; et al. Surface Modification of ZnO Electron Transport Layers with Glycine for Efficient Inverted Non-Fullerene Polymer Solar Cells. *Organic Electronics* **2019**, *70*, 25–31, <https://doi:10.1016/j.orgel.2019.03.039>.
